# Supplementary material for: Tetrahedron clusters serving as a platform for foam-like structure design
Source: Royal Society of Chemistry journal article supplement (doi:10.1039/d3na00470h), 2024-01-01
Supplement: d3na00470h1.pdf [file d3na00470h1.pdf]

## Tetrahedra clusters serving as platform to foam-like structures design

### Supplementary Information

*Jacek Jencyk*

*NanoBioMedical Centre, Adam Mickiewicz University, Wszechnicy Piastowskiej 3, 61-614  
Poznań, Poland*

*Corresponding Author: [jacjen@amu.edu.pl](mailto:jacjen@amu.edu.pl)*

#### **1. Animations (animated gif files to download)**

*Animation1:*

[https://drive.google.com/file/d/1pYXFC3Obx\\_IDvJW-f3DWhldGKmoU5xcl/view?usp=sharing](https://drive.google.com/file/d/1pYXFC3Obx_IDvJW-f3DWhldGKmoU5xcl/view?usp=sharing)

*Animation2:*

<https://drive.google.com/file/d/1ZvgpKgxrvzZXULwW8zKy2vtS7jvxcliM/view?usp=sharing>

*Animation3:*

<https://drive.google.com/file/d/1hTPgoaH2gkiKU-KNEGvK8NzW21Mq4T8W/view?usp=sharing>

*Animation4a:*

<https://drive.google.com/file/d/1HhzJXtnixUZQfipjMyvHliVf8RyTscgH/view?usp=sharing>

*Animation4b:*

[https://drive.google.com/file/d/1\\_0Hn2BZp7hrVco-OAF\\_dWYYFgzCQt8A9/view?usp=sharing](https://drive.google.com/file/d/1_0Hn2BZp7hrVco-OAF_dWYYFgzCQt8A9/view?usp=sharing)

*Animation5a:*

[https://drive.google.com/file/d/1jL0V-kSHOkP\\_fOo8W-tI1xNppx76DQII/view?usp=sharing](https://drive.google.com/file/d/1jL0V-kSHOkP_fOo8W-tI1xNppx76DQII/view?usp=sharing)

*Animation5b:*

<https://drive.google.com/file/d/1DMHN4DiZqXg-XiJmWQf3keLdC20w2dUG/view?usp=sharing>

Animation6:

[https://drive.google.com/file/d/1e\\_AD0fCwz7ryGW5HFX15pBBvCMXHt2lz/view?usp=sharing](https://drive.google.com/file/d/1e_AD0fCwz7ryGW5HFX15pBBvCMXHt2lz/view?usp=sharing)

Animation7:

[https://drive.google.com/file/d/1F1\\_3p-c\\_-9RN9Tw-yrOAwYXqROupeU1/view?usp=sharing](https://drive.google.com/file/d/1F1_3p-c_-9RN9Tw-yrOAwYXqROupeU1/view?usp=sharing)

## 2. Construction of clusters

Initially, one central tetrahedron was specified to satisfy two conditions: a) its centre is positioned at  $\{0,0,0\}$  in a Cartesian coordinate system, b) its height  $h=l$ . See Fig. S1 below.

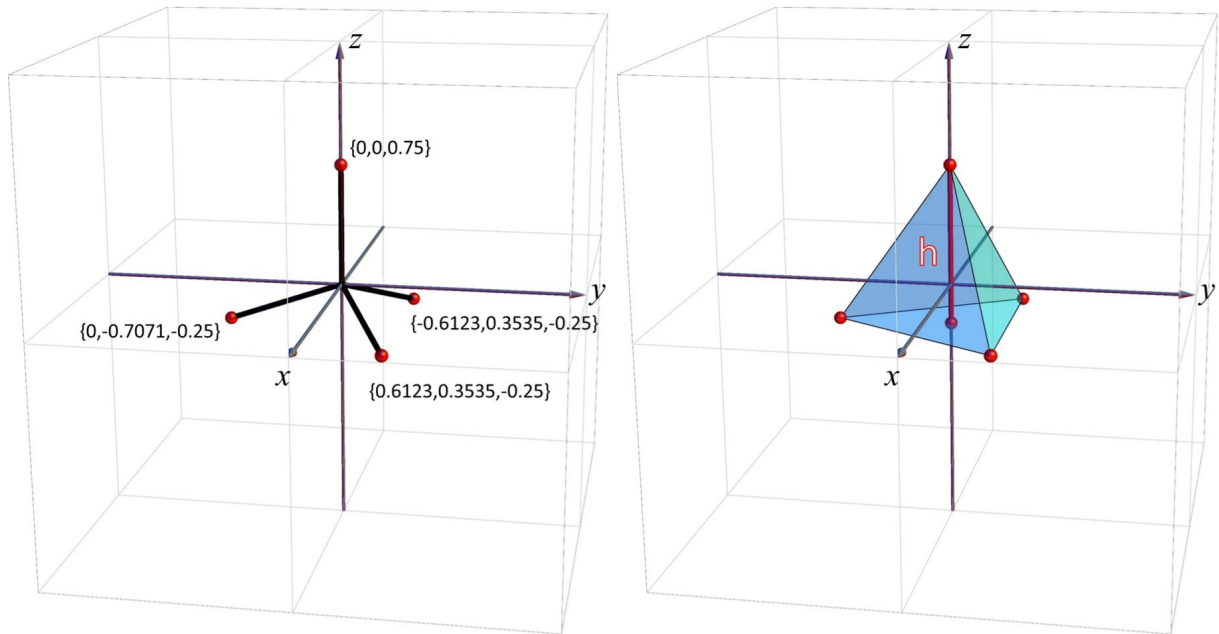

Fig. S1. Initially specified tetrahedron.

Knowing coordinates of one particular tetrahedron it is relatively simple to find coordinates of adjacent tetrahedra taking into consideration that each tetrahedron has the height  $h=l$ . As an example let us find coordinates of point  $D\{z,y,z\}$  (presented in Fig.S2), which is the fourth vertex of adjacent tetrahedron. First, one has to specify normal vector  $\vec{n}$  to the triangular face determined by points ABC. It can be done by a calculation of the cross product  $\vec{n} = \vec{a} \times \vec{b}$  where  $\vec{a} = \vec{B} - \vec{A}$  and  $\vec{b} = \vec{C} - \vec{A}$ . Here, coordinates A, B, and C are treated as a free vectors. Subsequently, one has to calculate unit vector  $\hat{n} = \frac{\vec{n}}{|\vec{n}|}$  and translate it using a free vector  $\vec{O}$  which points at the centre of a triangle ABC. Accordingly, the terminal point of the translated unit vector  $\hat{n}_T$  identifies coordinates of point  $D\{z,y,z\}$ .

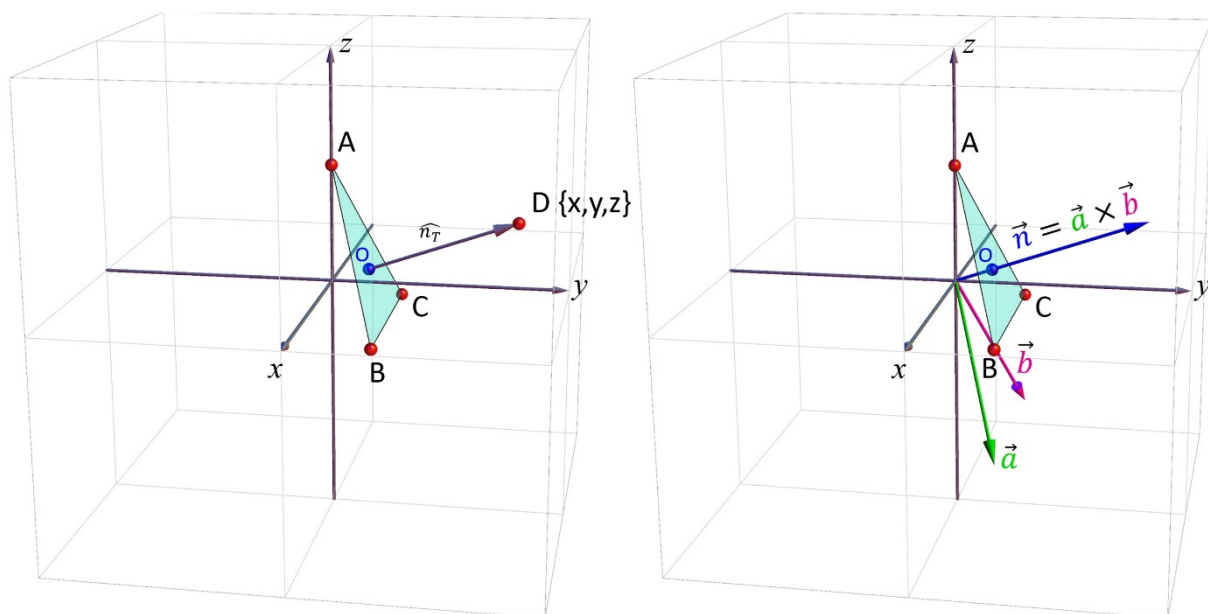

Fig. S2. Determination of adjacent tetrahedron coordinates.

Above mentioned procedure can be used to construct any tetrahedra clusters, which grow via simple face-face joint steps (i.e. where two adjacent tetrahedra always share one common face). Following this protocol (see Fig. S3) one can initially construct a four-armed tetrahedral star,  $N=5$  cluster and subsequently decorate it with additional layer of tetrahedra to finally reach  $N=17$  cluster, which is also discussed in the paper.

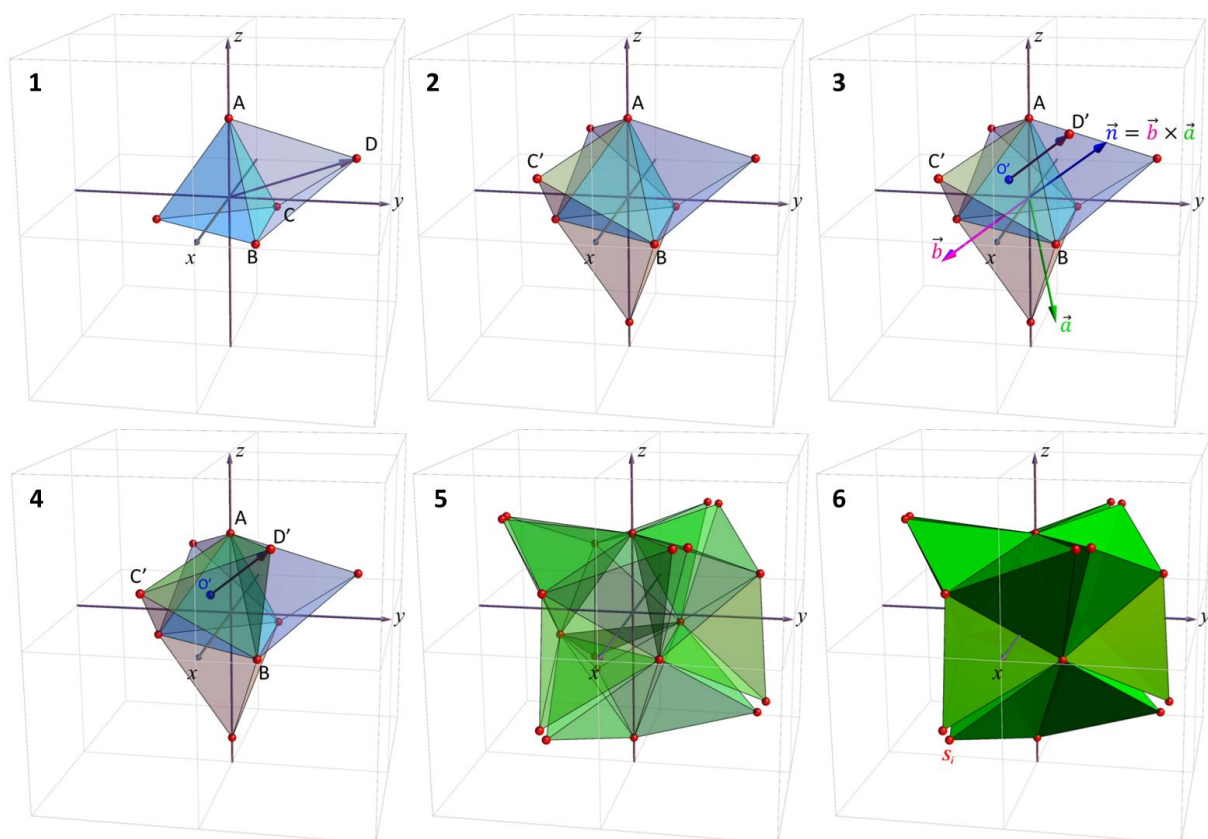

Fig. S3. tetrahedra clusters construction scheme.

In order to construct N=41 cluster (see Fig. S4) one has to decorate N=17 cluster with additional 24 surface tetrahedra employing the same procedure as before.

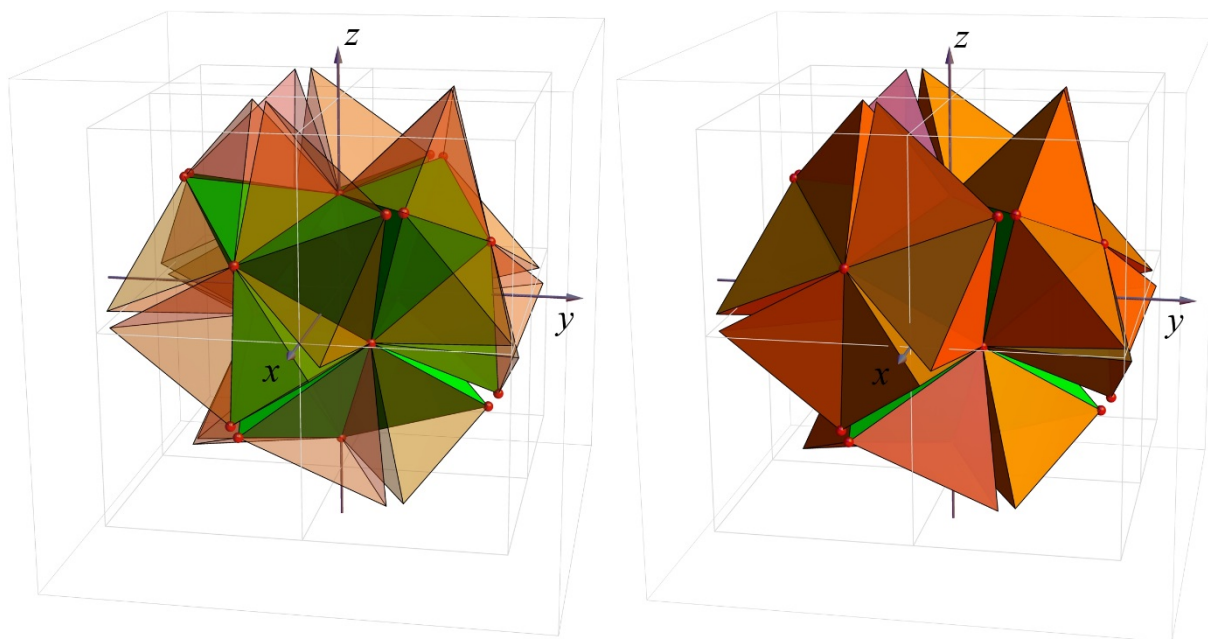

Fig. S4. N=41 cluster (orange) constructed via "decoration" of N=17 cluster (green) with additional 24 surface tetrahedra.

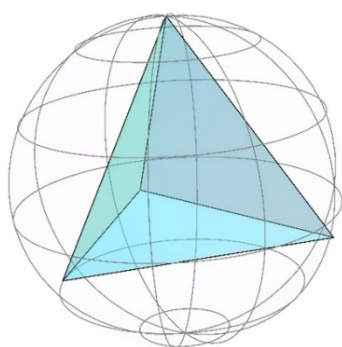

$$G_0: N=1$$
$$\frac{NV_t}{V_s} \cong 0.122$$

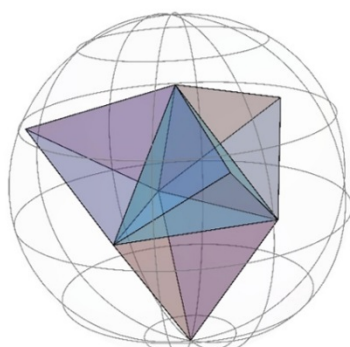

$$G_1: N=5$$
$$\frac{NV_t}{V_s} \cong 0.132$$

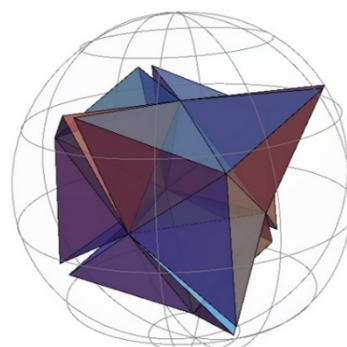

$$G_2: N=17$$
$$\frac{NV_t}{V_s} \cong 0.264$$

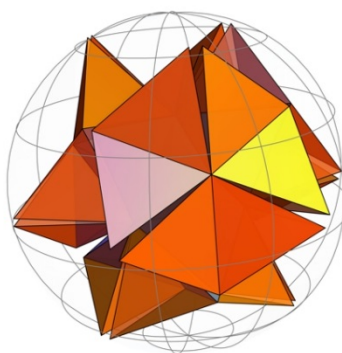

$$G_3: N=41$$
$$\frac{NV_t}{V_s} \cong 0.347$$

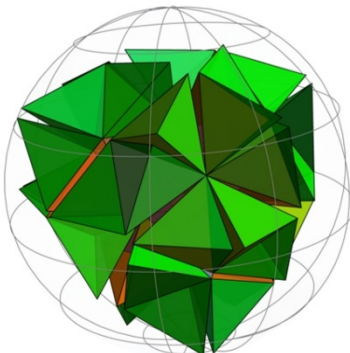

$$G_4: N=77$$
$$\frac{NV_t}{V_s} \cong 0.336$$

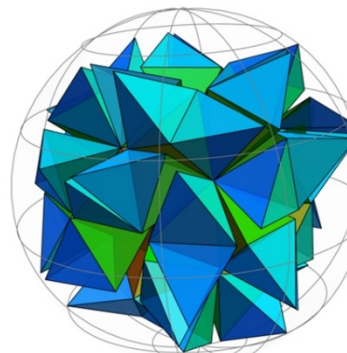

$$G_5: N=125$$
$$\frac{NV_t}{V_s} \cong 0.38$$

Fig. S5. Generations from  $G_1$  to  $G_5$ .  $N$  signifies number of tetrahedra involved in the cluster.  $V_t$  signifies the volume of one tetrahedron,  $V_s$  signifies the volume of the sphere in which the cluster is embodied.



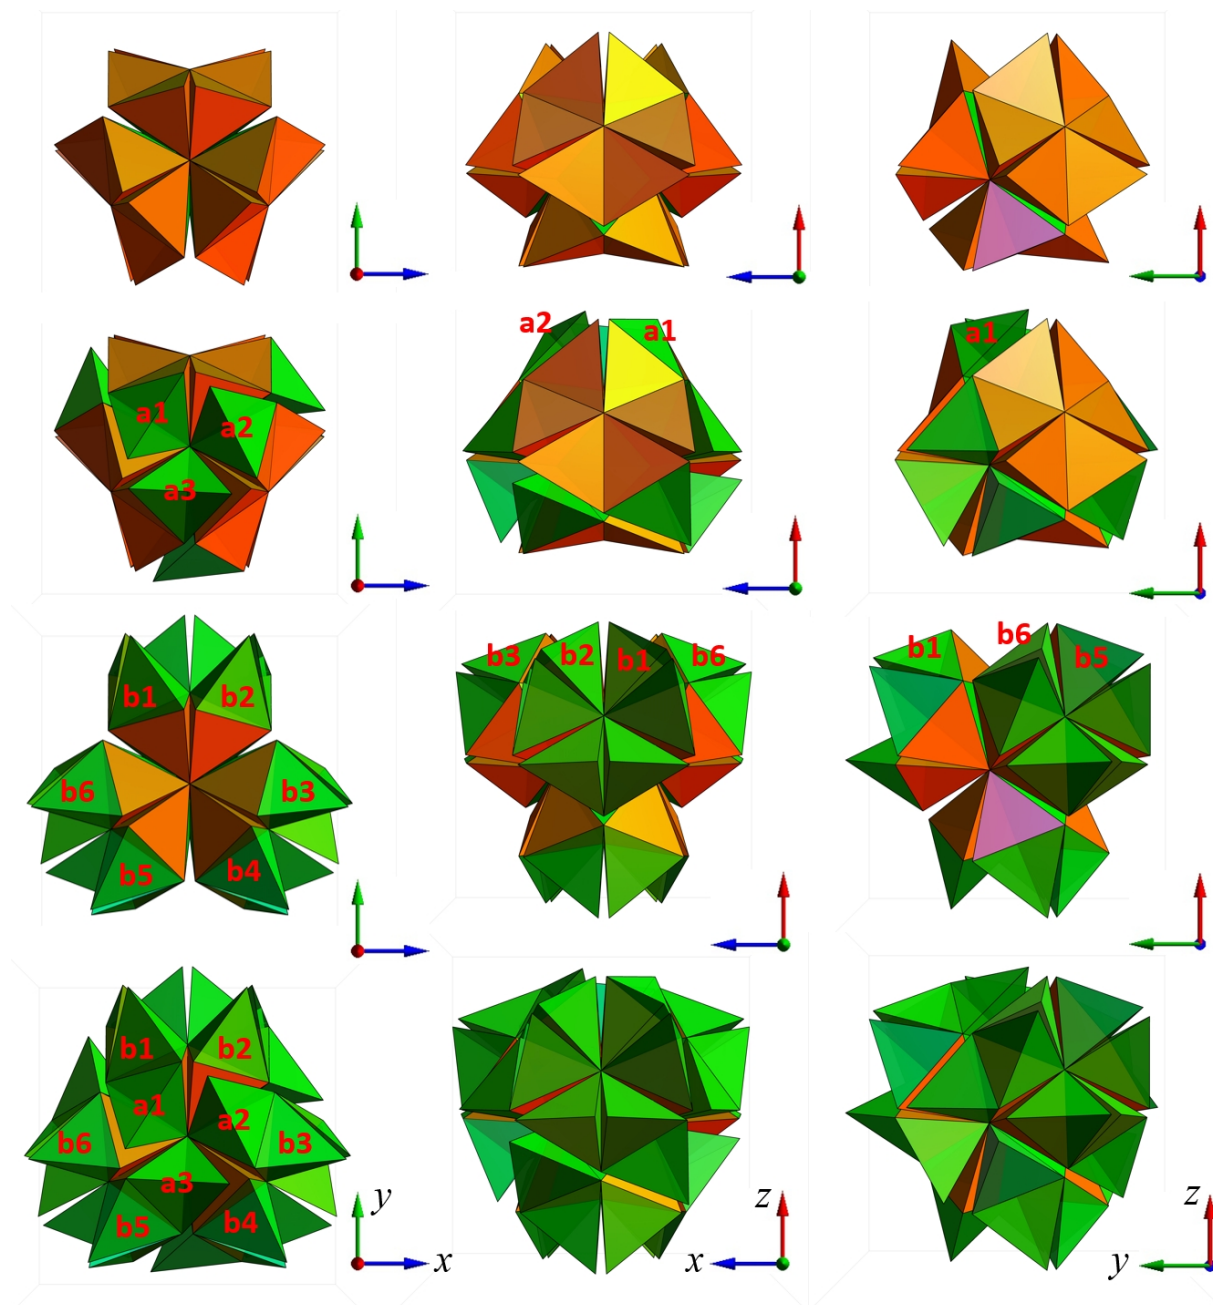

Fig. S6. Illustrates decoration of  $G_3$  cluster to reach  $G_4$ . Top line represents three orthogonal, spatial projections of  $G_3$  cluster. The very bottom line shows the same three projections of  $G_4$  cluster. In between are shown two sub-populations of surface tetrahedra ( $12a+24b$ ), which have to be added to reach  $G_4$ .

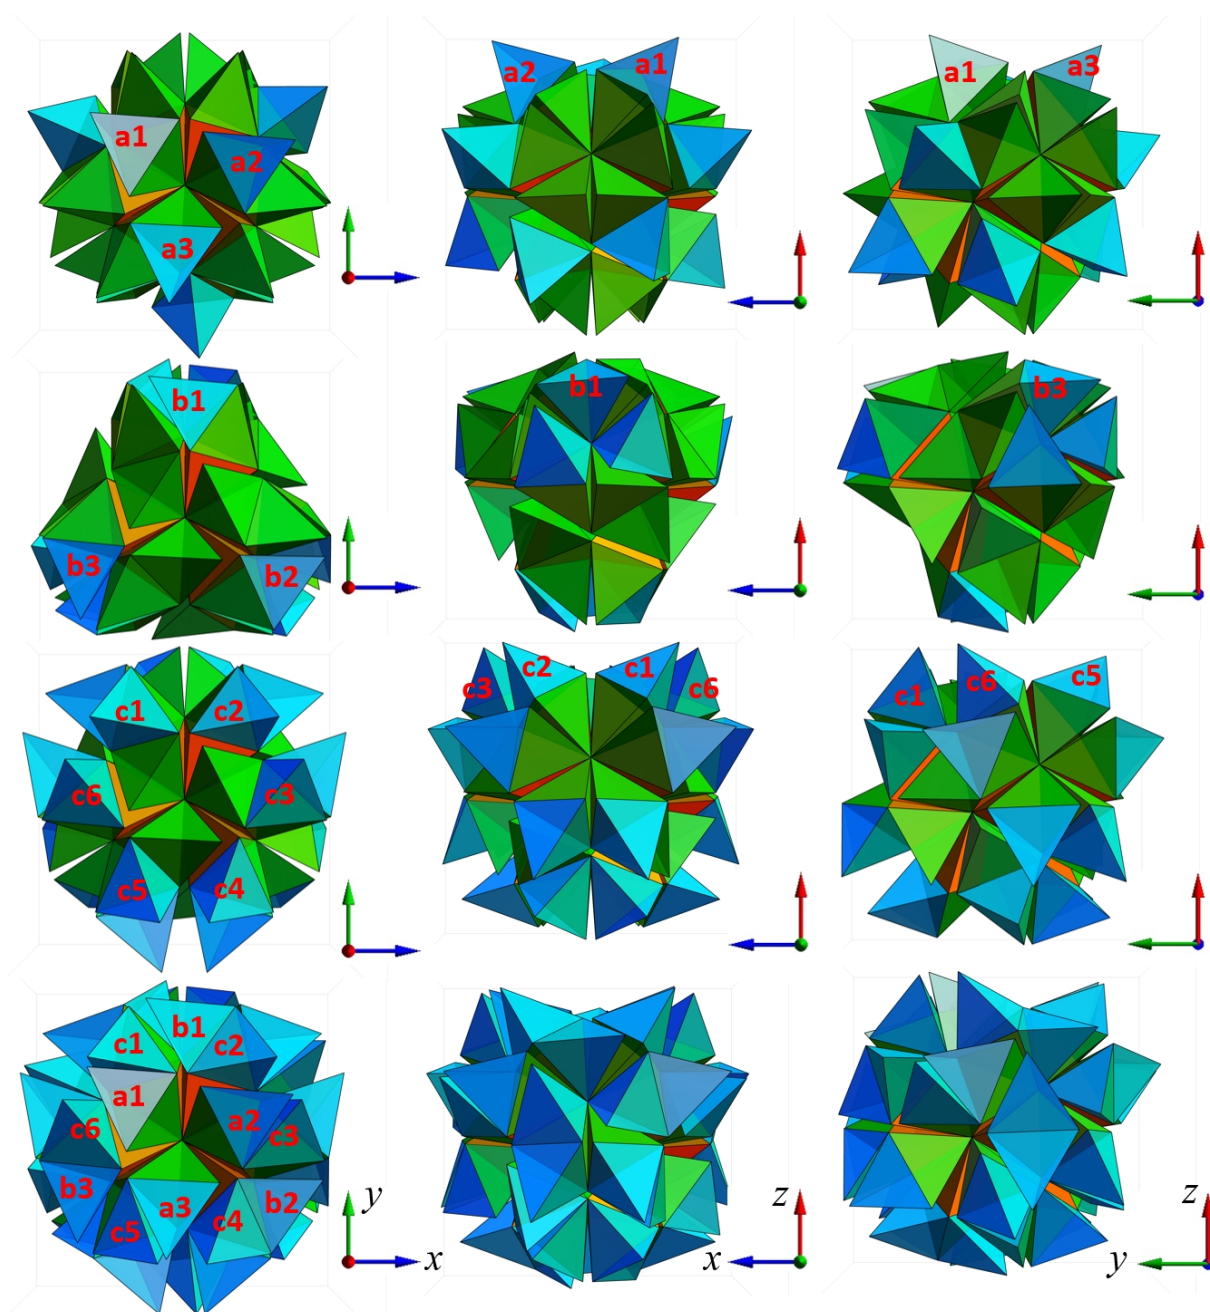

Fig. S7. Illustrates decoration of  $G_4$  cluster to reach  $G_5$ . The very bottom line shows three orthogonal, spatial projections of  $G_5$  cluster. Above are shown three sub-populations of surface tetrahedra ( $12a+12b+24c$ ), which have to be added to reach  $G_5$ .

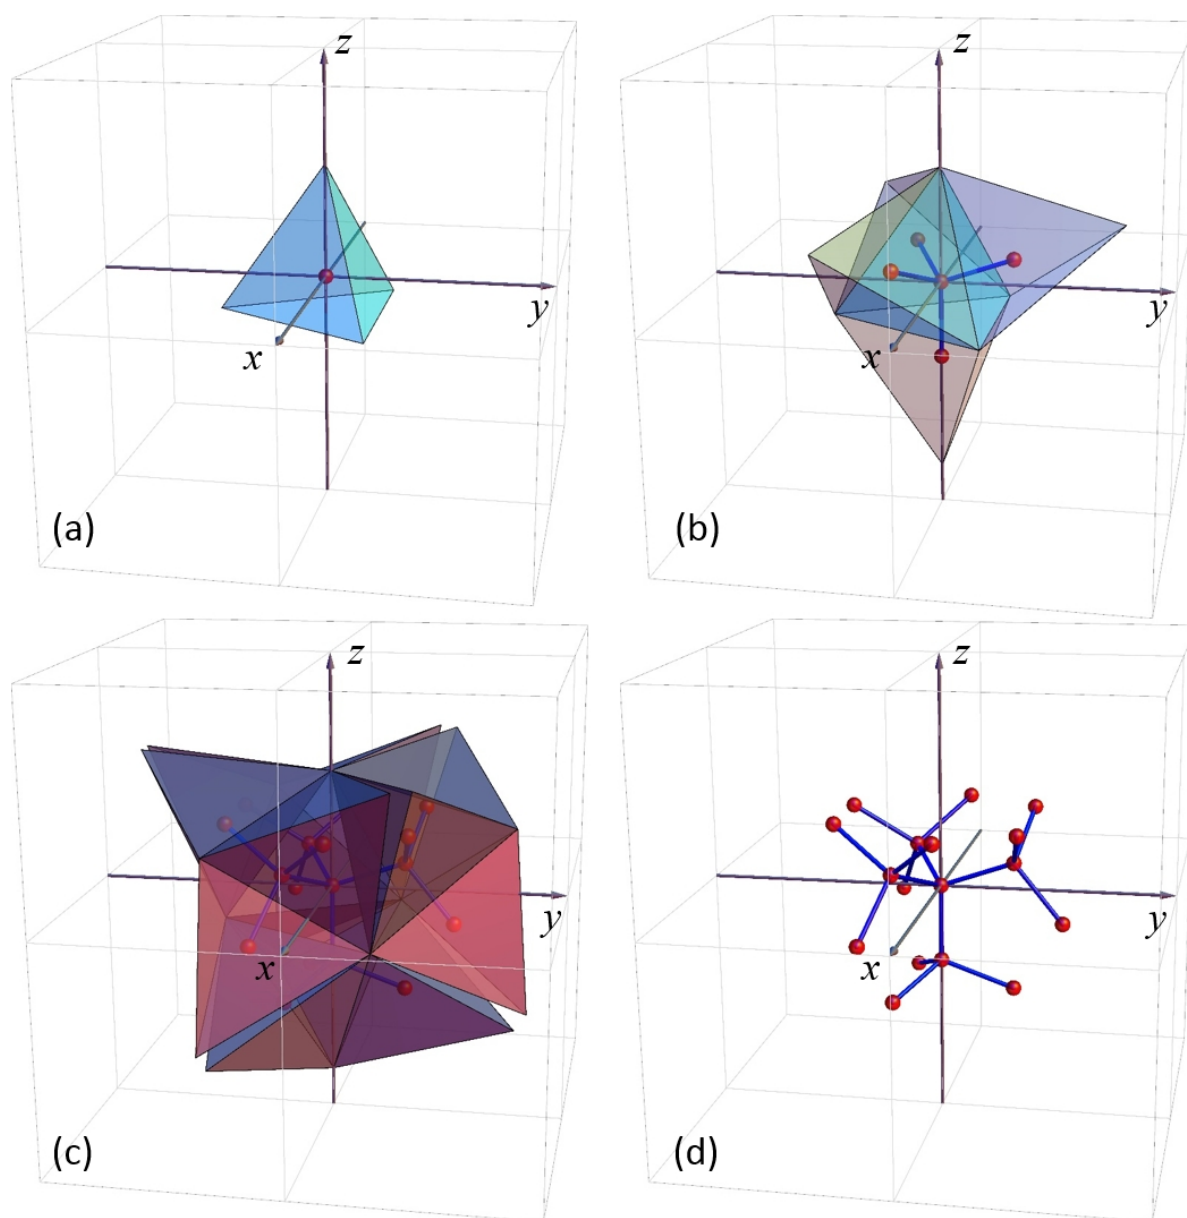

Fig. S8. Sequential dendrimer formation protocol exemplified on  $G_1$  and  $G_2$  clusters. Initially, all central points (centres of gravity) of individual tetrahedra have to be specified and, subsequently, the connections are constituted only between those tetrahedra which share one common face.



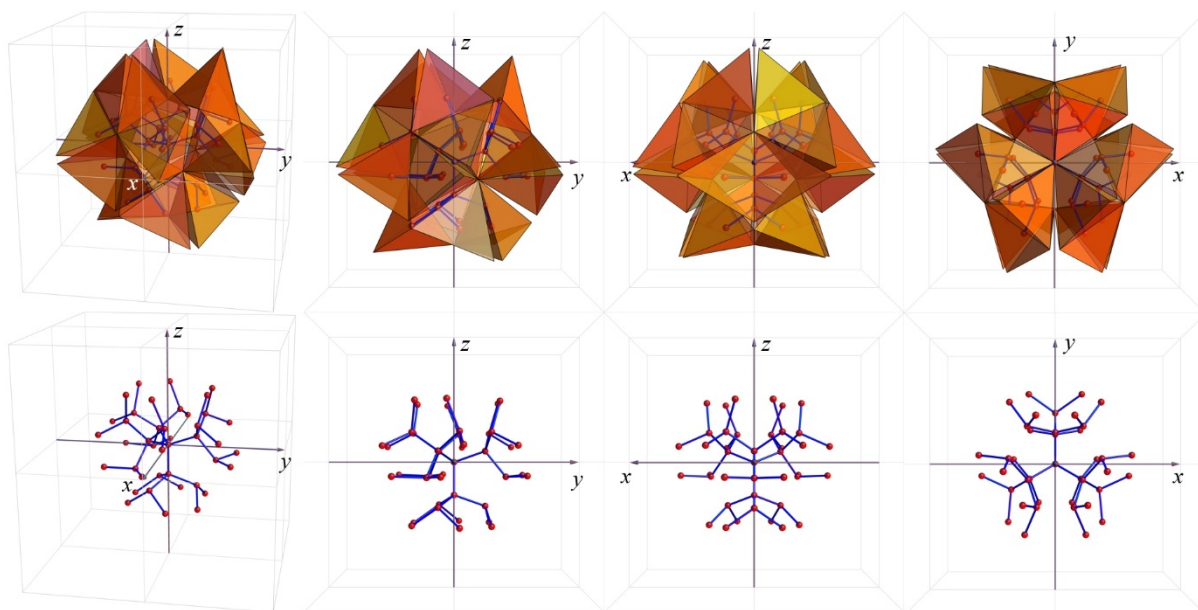

Fig. S9.  $G_3$  dendrit. *Top*) illustrates four different projections of  $G_3$  cluster, *bottom*) illustrates the same four different projections of the corresponding tetrahedral dendrit.

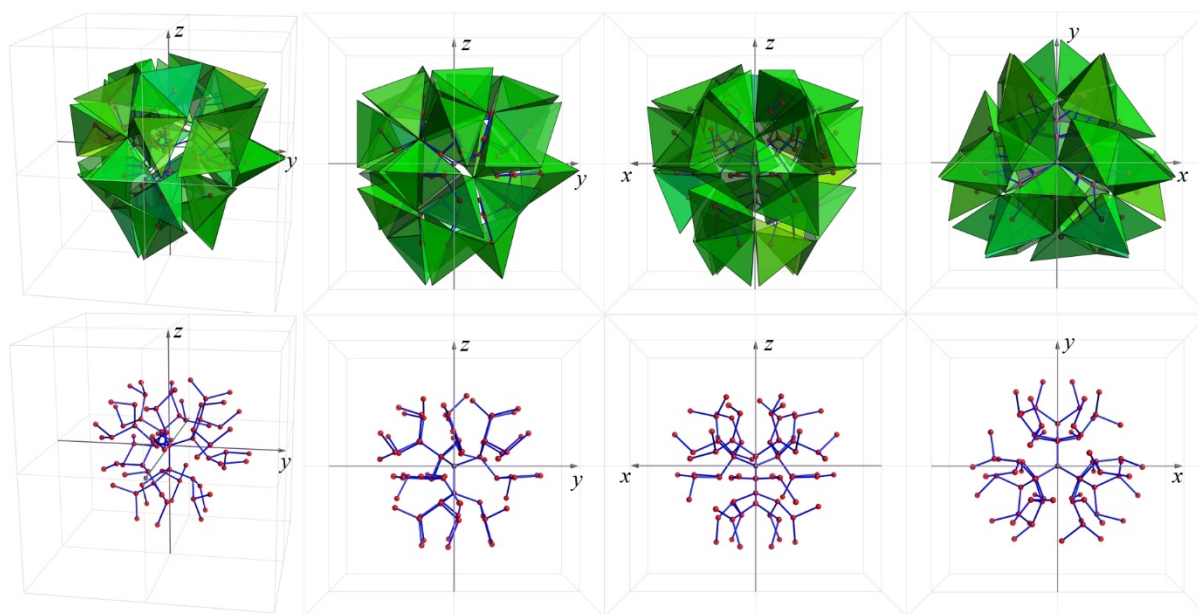

Fig. S10.  $G_4$  dendrit. *Top*) illustrates four different projections of  $G_4$  cluster, *bottom*) illustrates the same four different projections of the corresponding tetrahedral dendrit.

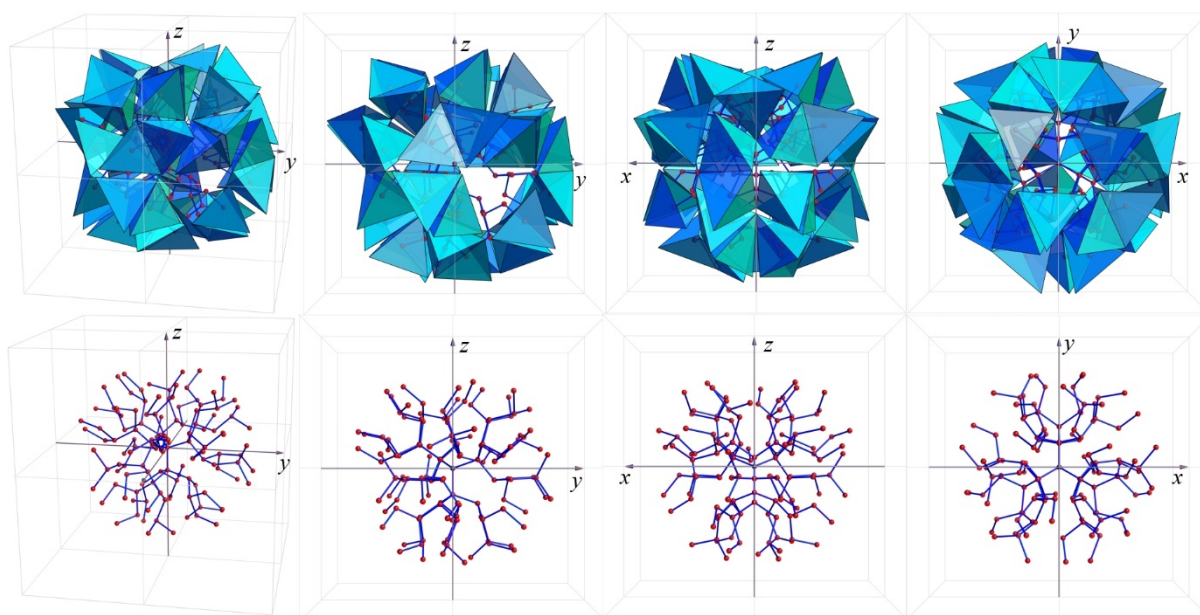

Fig. S11.  $G_5$  dendrit. *Top*) illustrates four different projections of  $G_5$  cluster, *bottom*) illustrates the same four different projections of the corresponding tetrahedral dendrit.

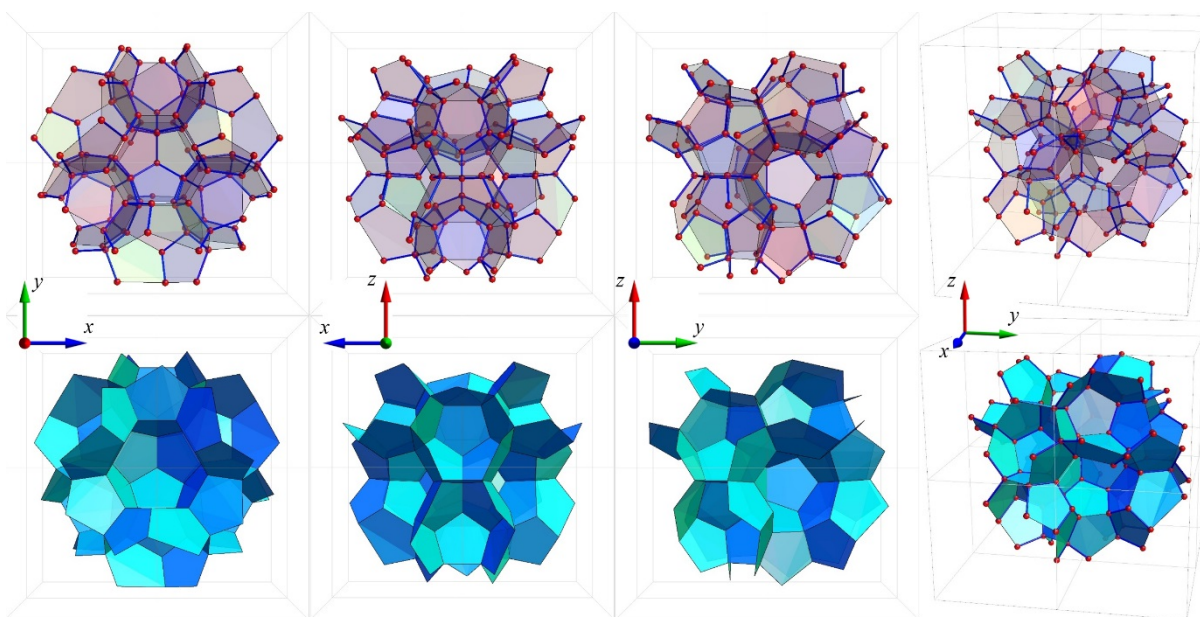

Fig. S12. *top*) shows tetrahedral dendrit viewed from four different angles. *Bottom*) illustrates solely the pentagonal membranes stretched onto the dendrit.

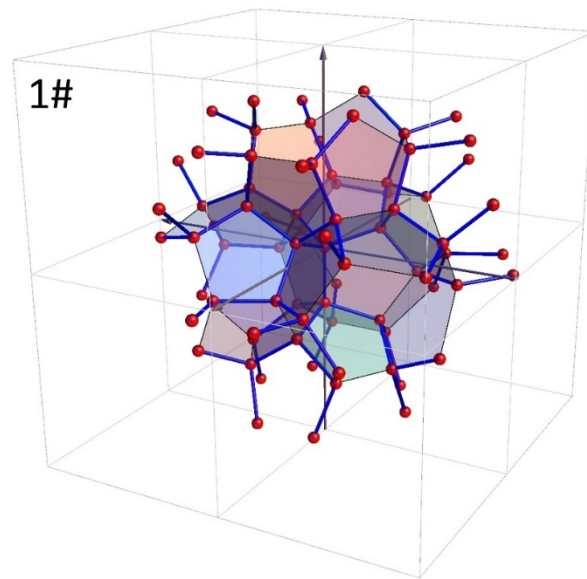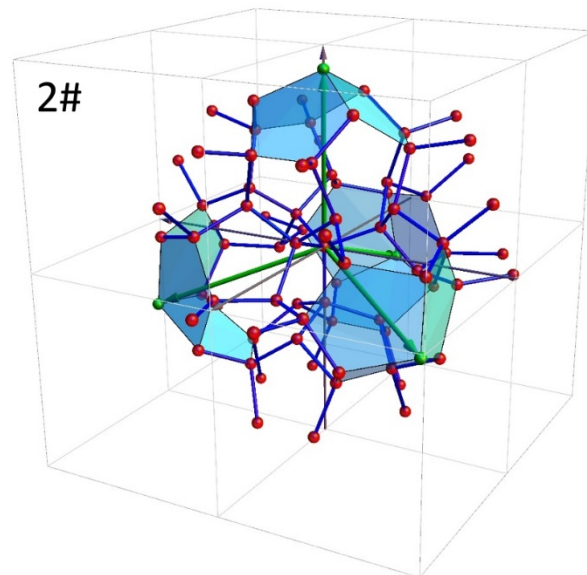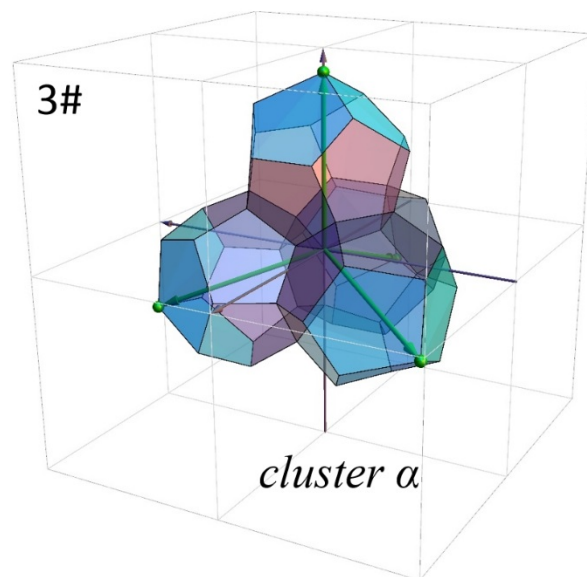

Fig. S13 open cells are „artificially” closed using additional pentagonal membranes taking into account tetrahedral symmetry. Green vectors are tetrahedrally coordinated.



### 3. Various foam-like, periodic structures

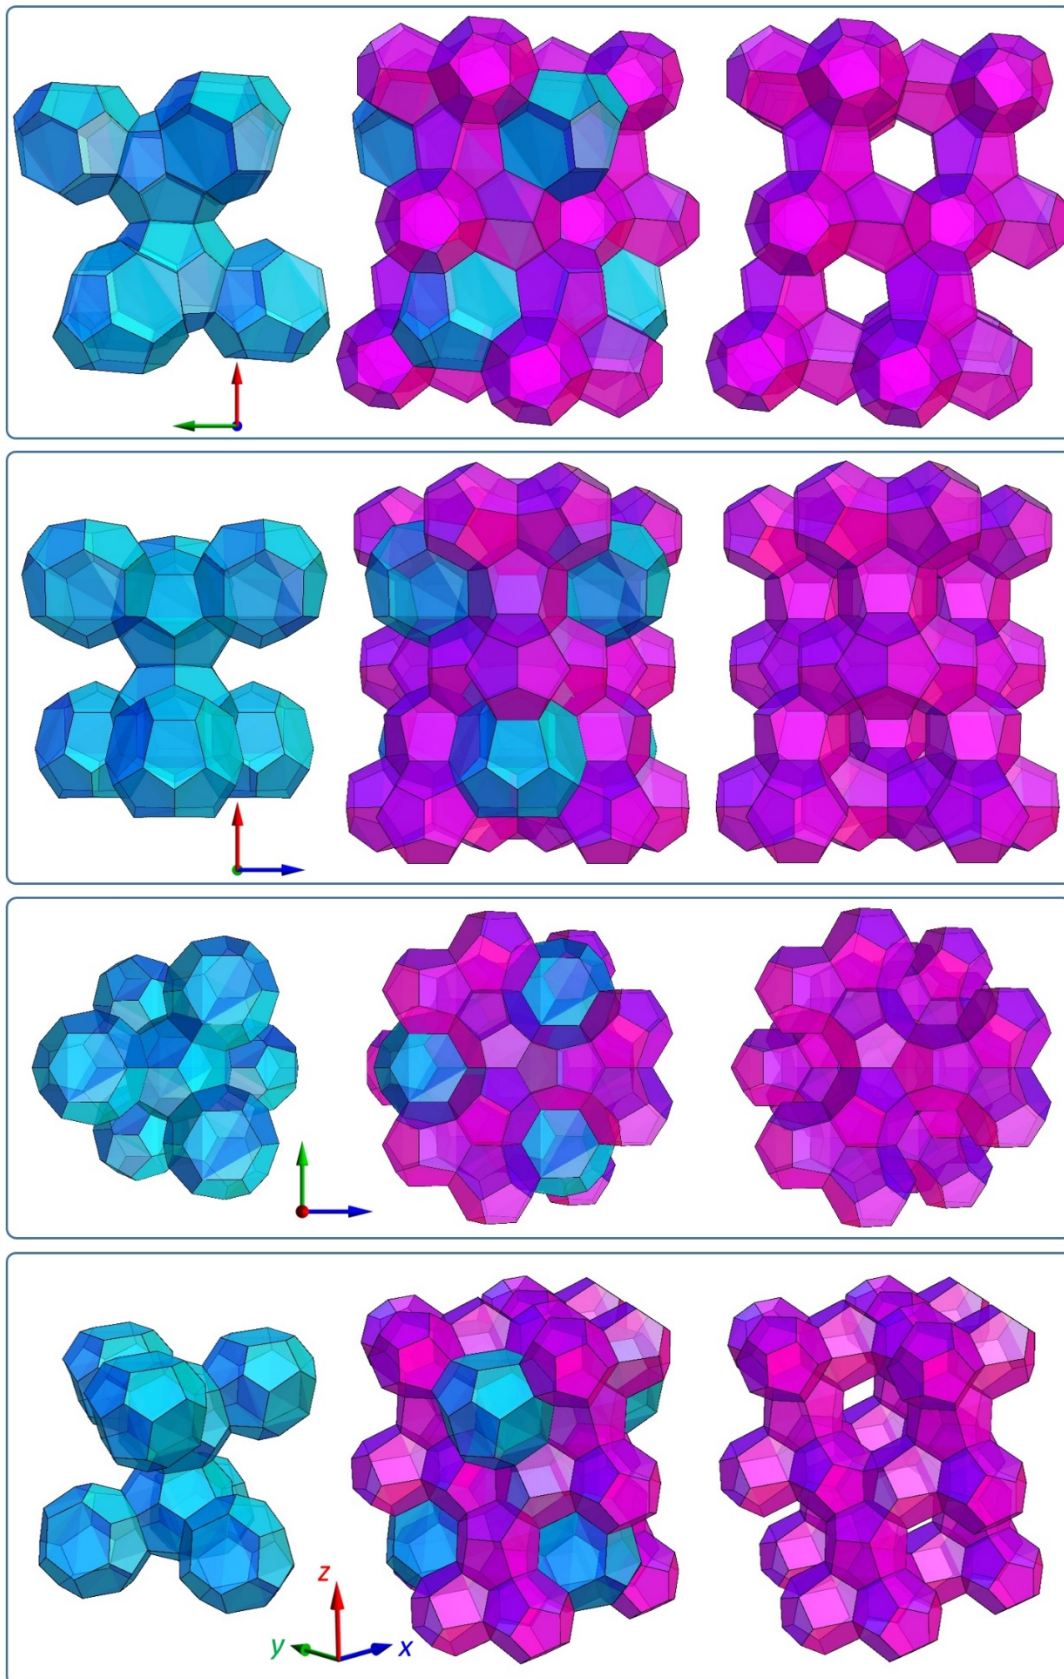

Fig. S14. Four different projections displaying Structure A, which resembles sII framework typical for hydrates.

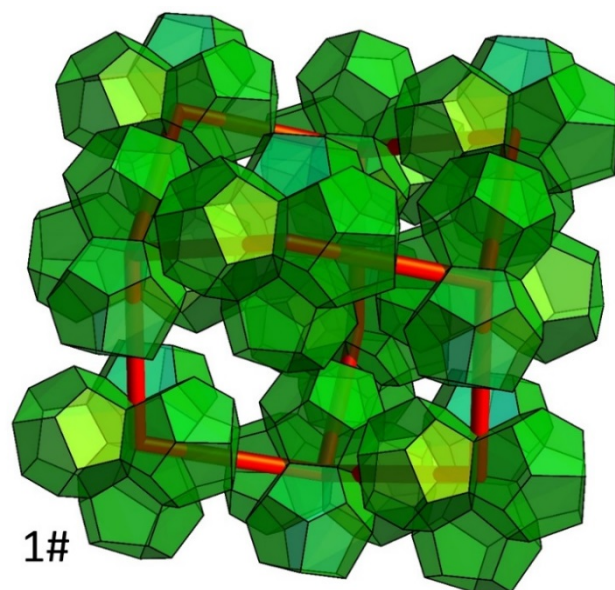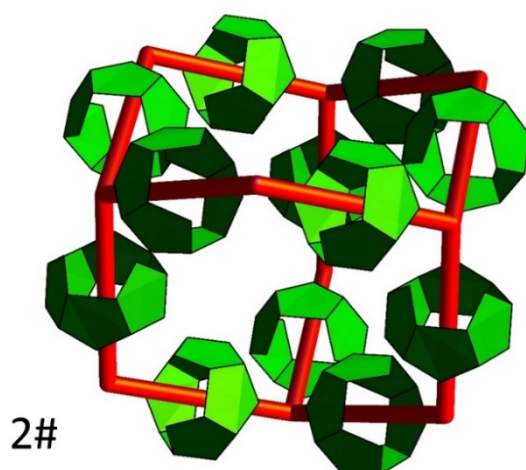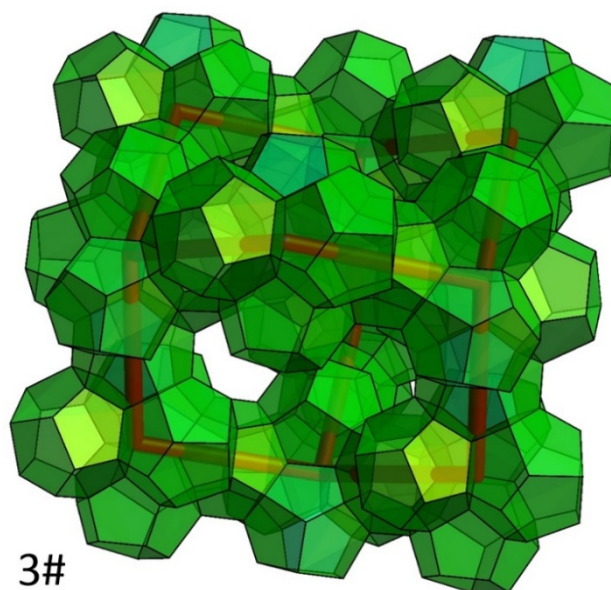

Fig. S15. Design of structure B – linkers geometry. 1#) 10 *a* clusters positioned onto adamantane cage-like scaffold, 2#) *a* clusters are interconnected via dodecahedra.



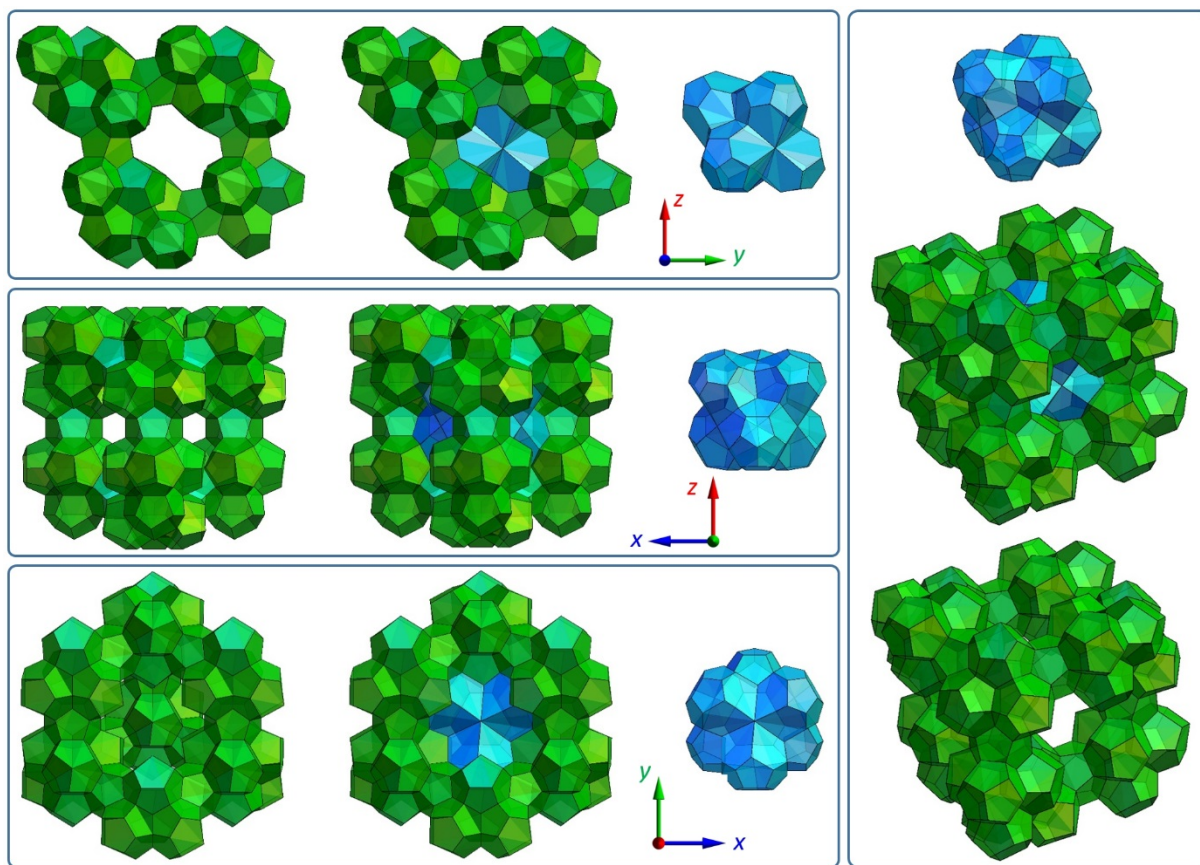

Fig. S16. Structure B – geometry of void – four different projections shown.

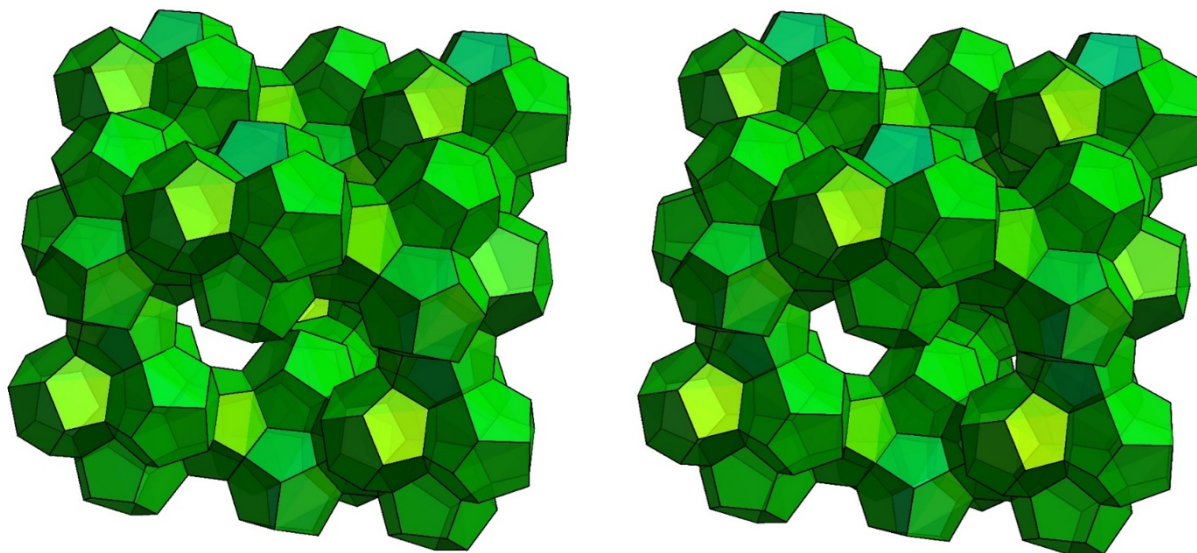

Fig. S17. Structure B - stereoscopic view

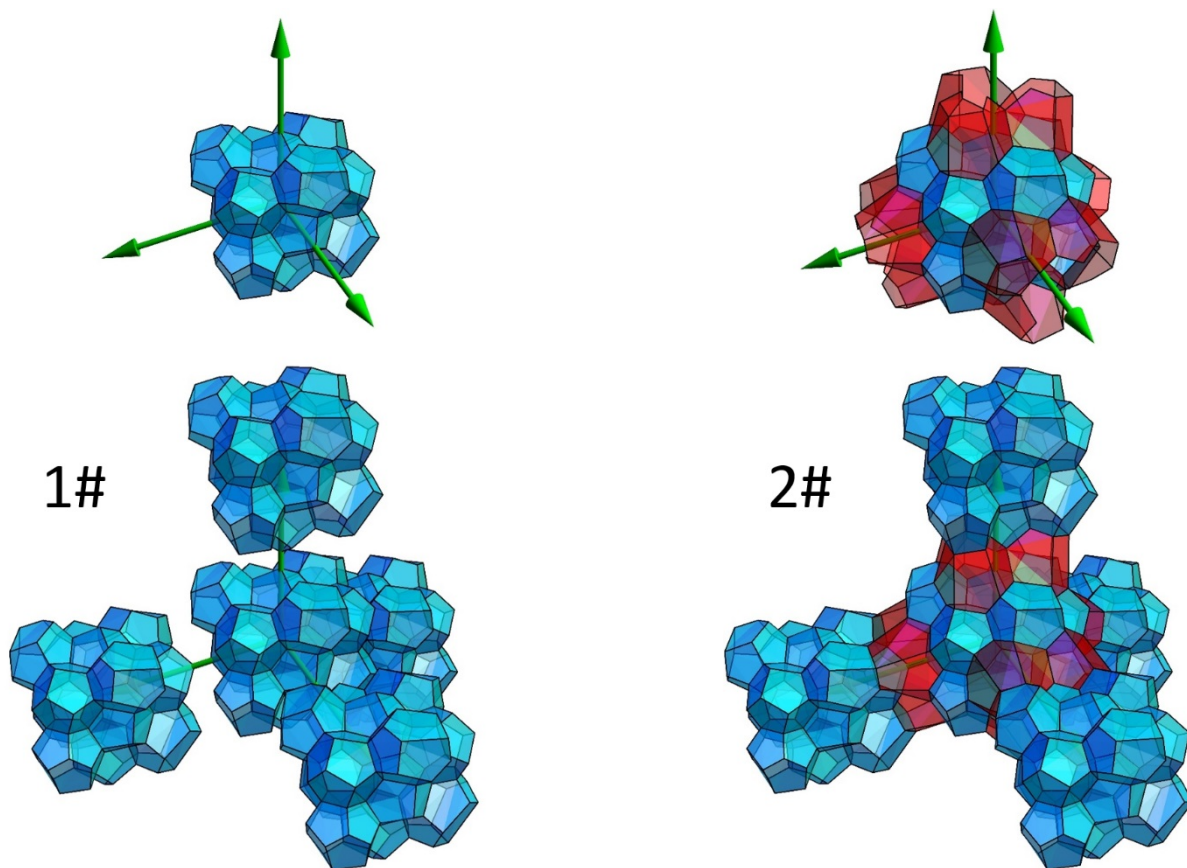

Fig. S18. Structure  $\Gamma$  (single diamond) based on  $\gamma$  cluster-linkers geometry. Green vectors are tetrahedrally coordinated.

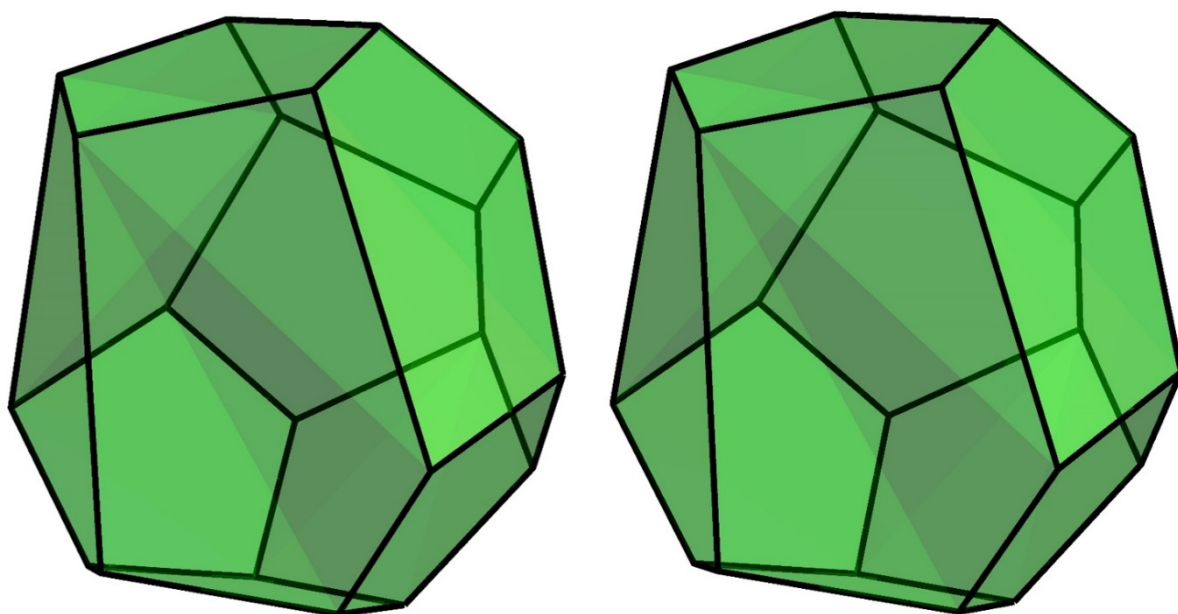

Fig. S19. Linker geometry (used in structure  $\Gamma$  and  $\Delta$ ) - stereoscopic view



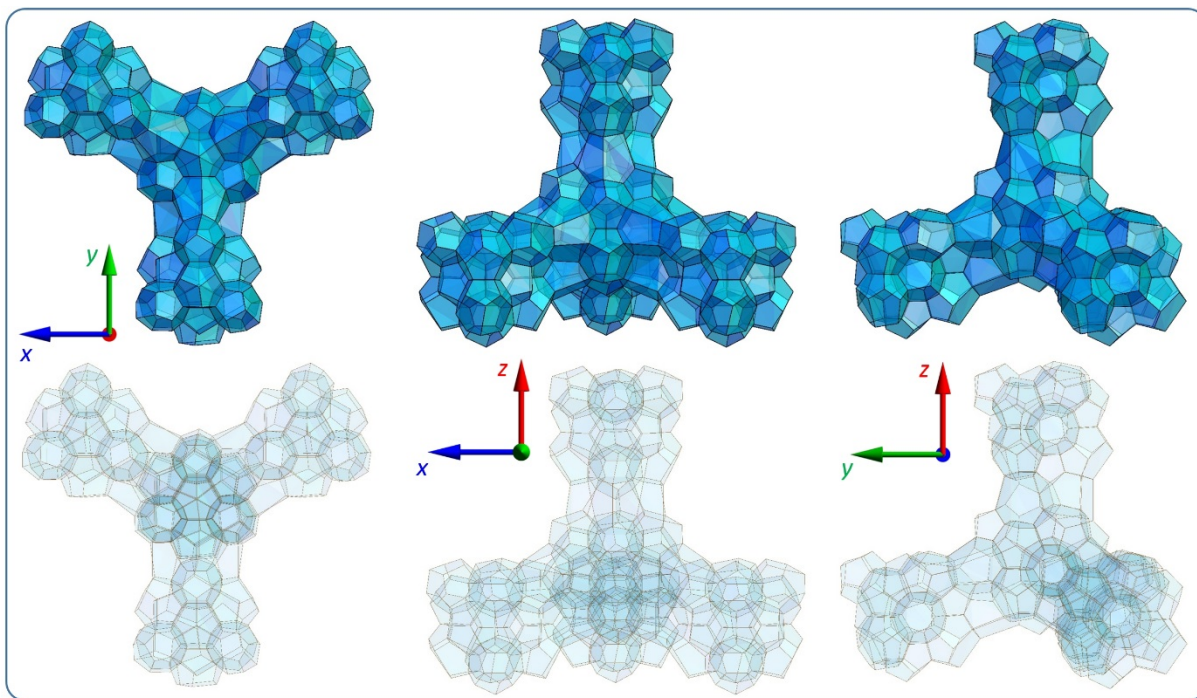

Fig. S20. Structure  $\Gamma$  (single diamond) – three different points of view.

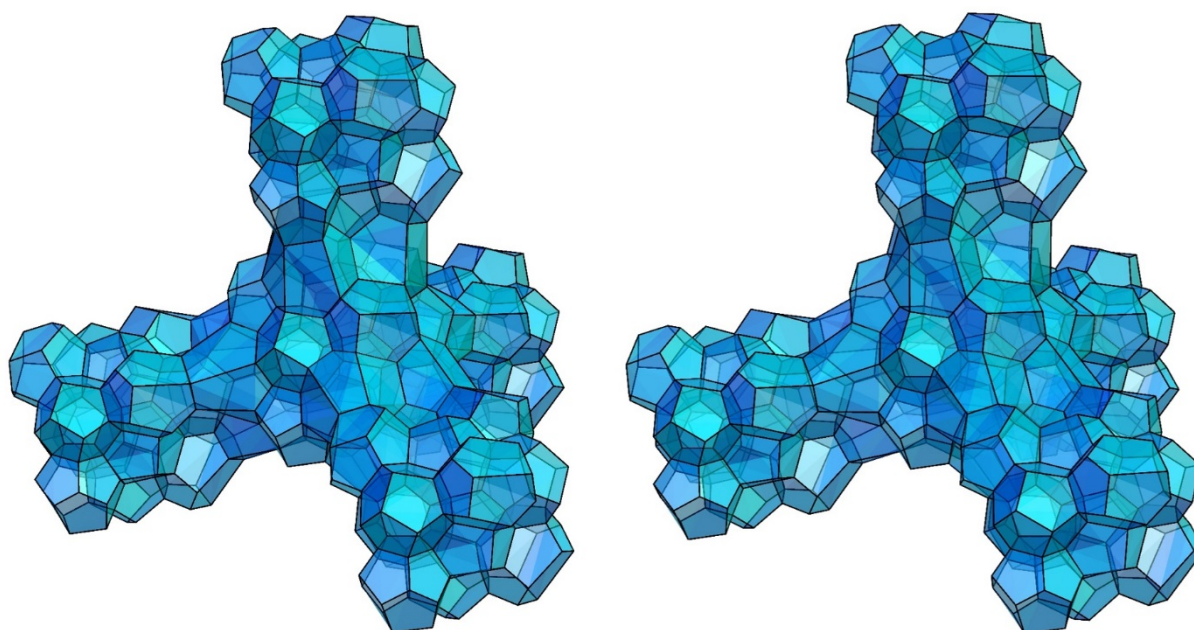

Fig. S21. Structure  $\Gamma$  (single diamond) - stereoscopic view

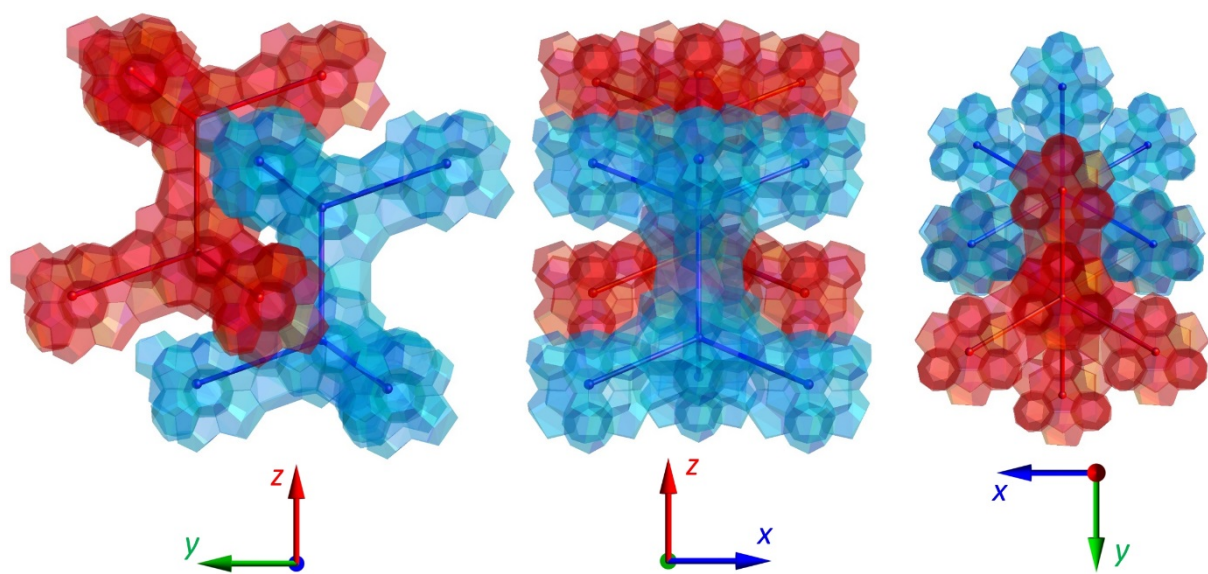

Fig. S22. Structure  $\Gamma$  (DD) - three different points of view.

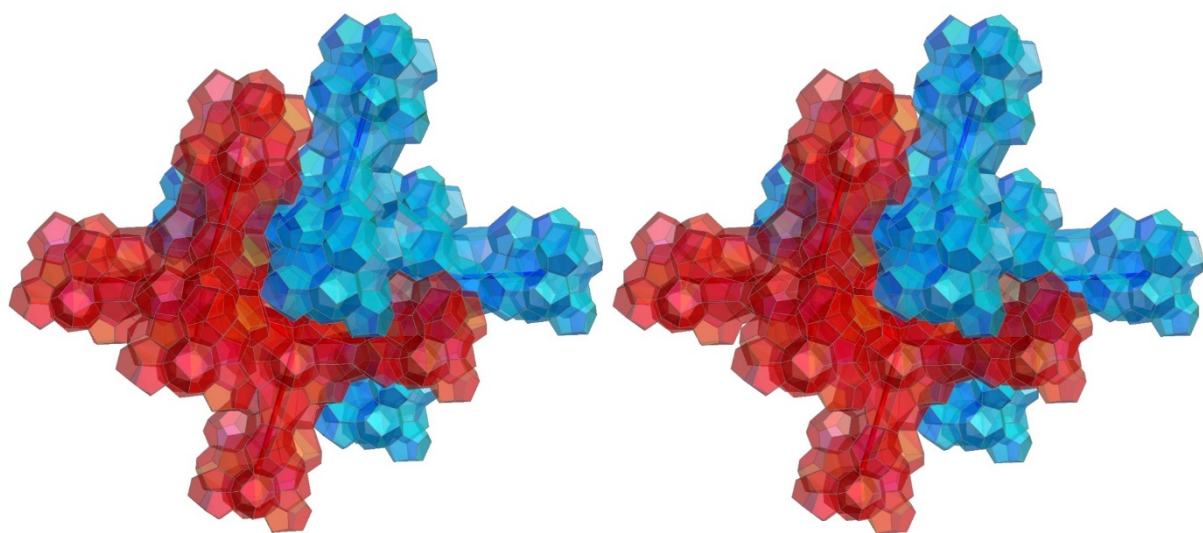

Fig. S23. Structure  $\Gamma$  (DD) -stereoscopic view



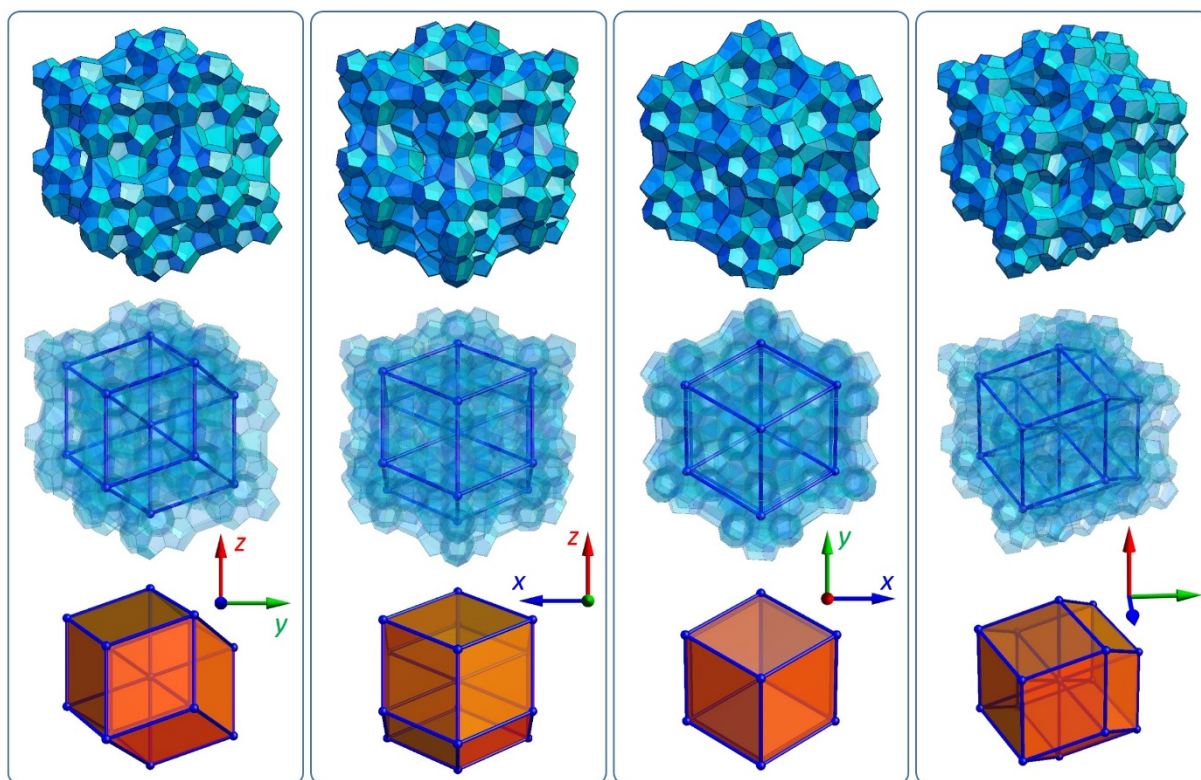

Fig. S24. Structure  $\Delta$  - four different points of view.

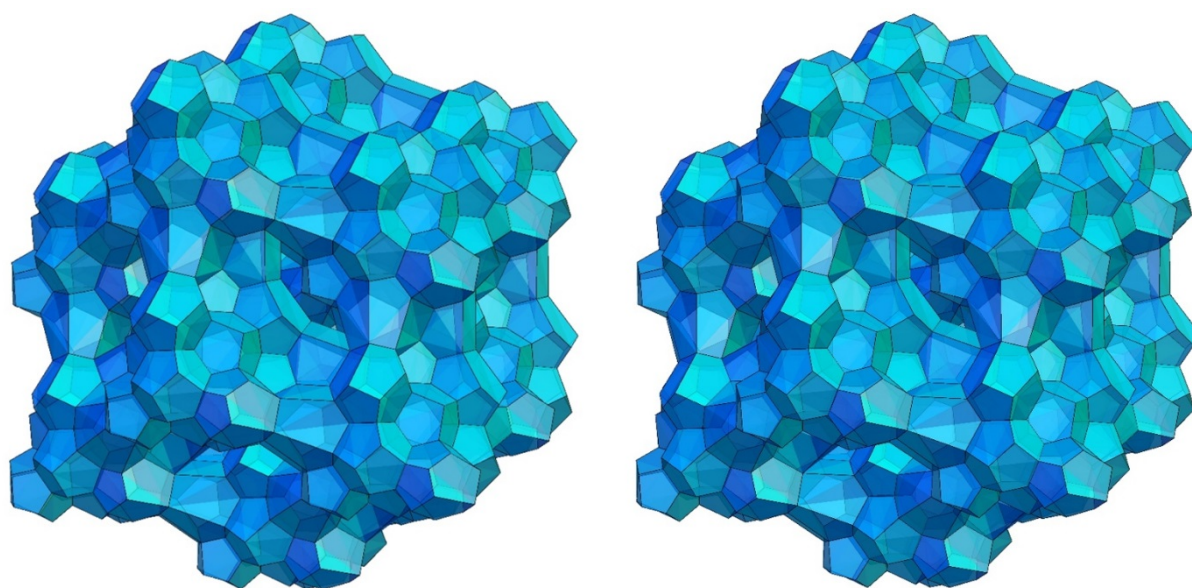

Fig. S25. Structure  $\Delta$  - stereoscopic view
